# Supplementary material for: Hydrazine-Assisted Formation of Indium Phosphide (InP)-Based Nanowires and Core-Shell Composites
Source: MDPI journal article supplement (doi:10.3390/ma6010085), 2012-12-27
Supplement: s1 [file s1]

## Supporting Information

**Figure S1.** Representative scanning electron microscope (SEM) image of products grown from an InP source at 540 °C on glass substrate (scale bar = 2  $\mu$ m).

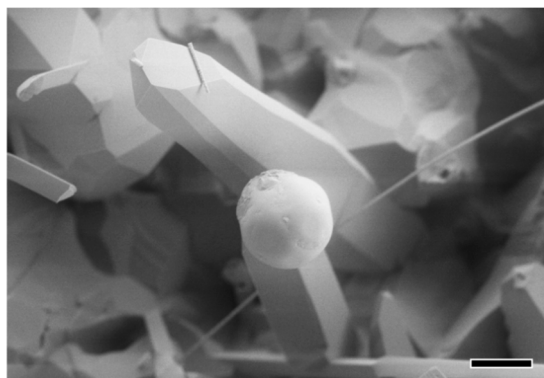

**Figure S2.** High-angle annular dark field scanning transmission electron microscopy (HAAD-STEM) image and energy dispersive X-ray (EDX) analyses of InP wires grown on Si substrate at 440°C (C and Cu signals arise from the Transmission electron microscopy (TEM) grid and partial surface contamination due to air exposure).

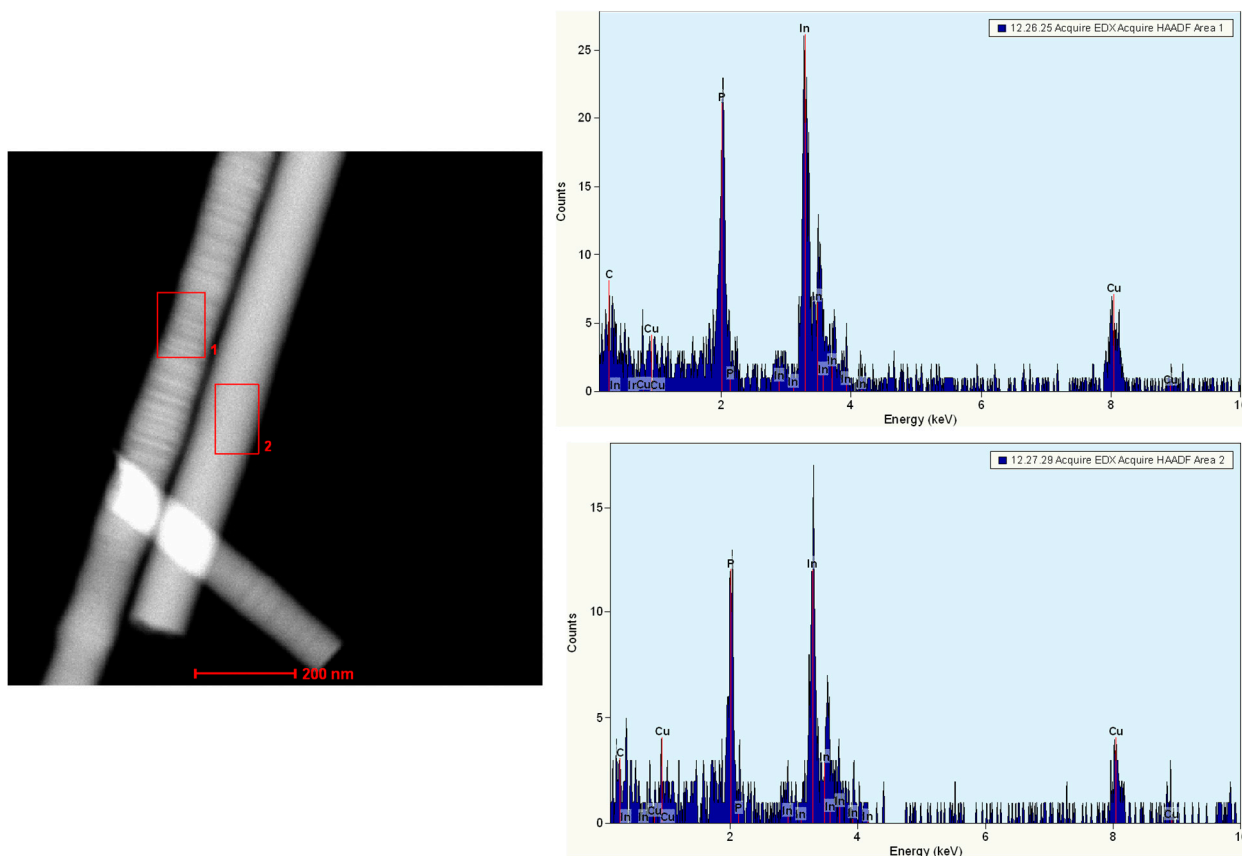

**Figure S3.** Representative TEM images of InP–Ga nanowires.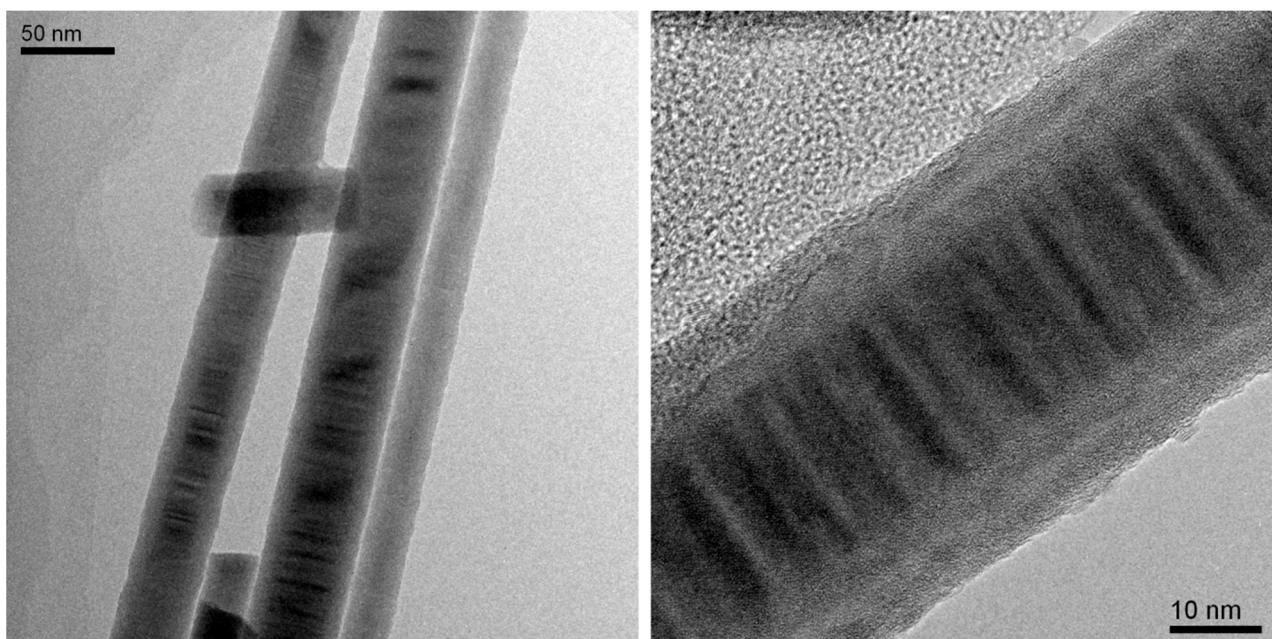**Figure S4.** Scanning transmission electron microscopy energy dispersive X-ray (STEM-EDX) analyses of InP–Ga nanowires (grown on Si substrate at 350 °C).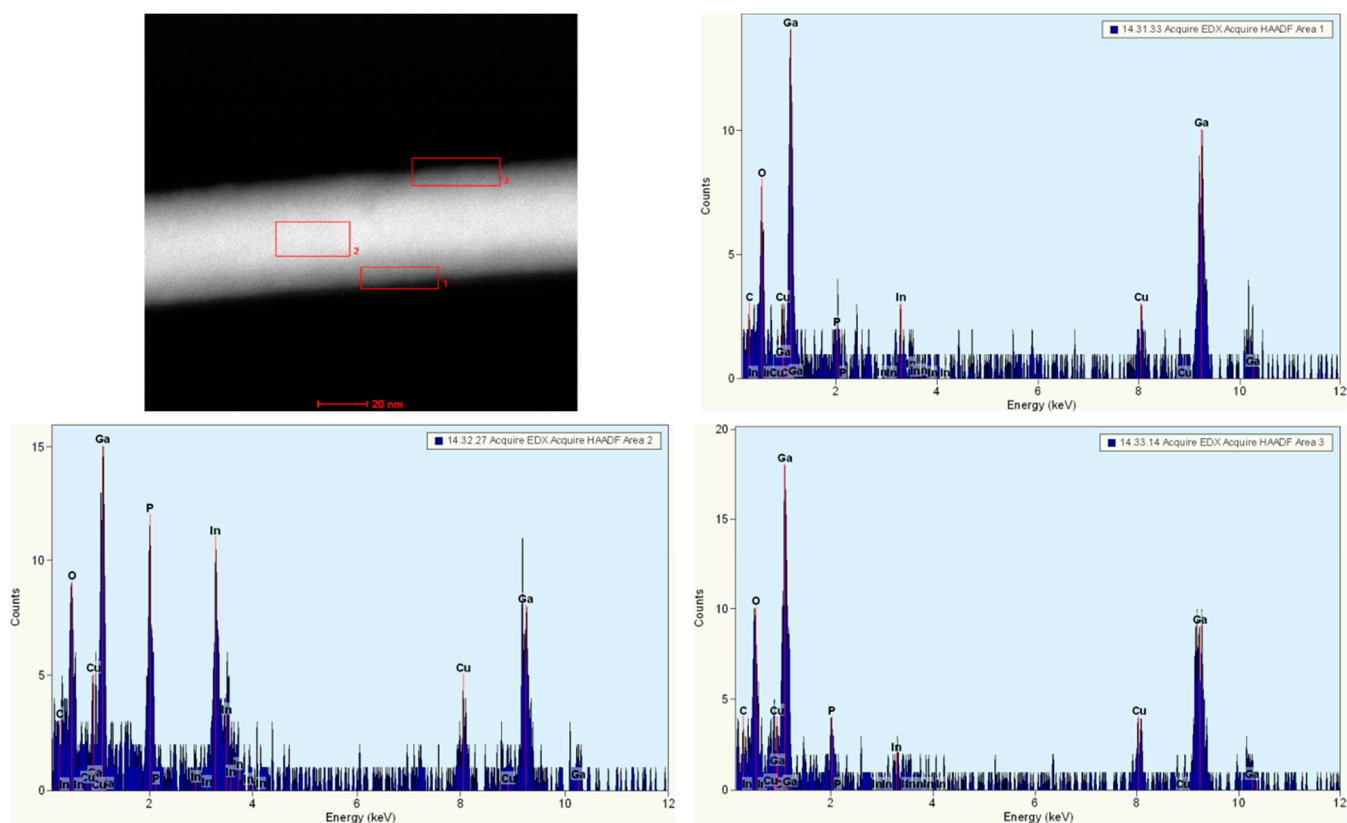

**Figure S5.** STEM-EDX analyses of InP-Zn wires (grown on Si substrate at 400° C).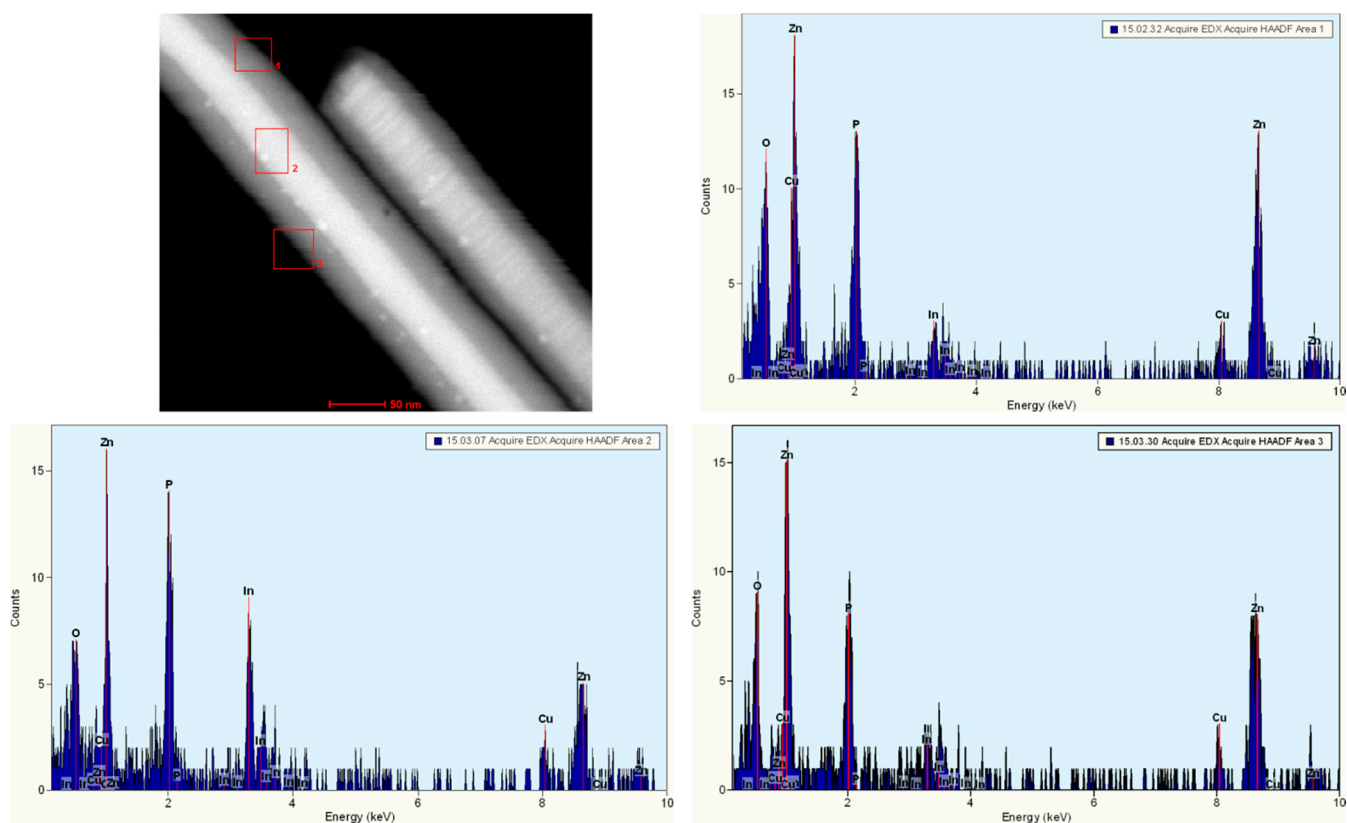

© 2013 by the authors; licensee MDPI, Basel, Switzerland. This article is an open access article distributed under the terms and conditions of the Creative Commons Attribution license (<http://creativecommons.org/licenses/by/3.0/>).
